# Supplementary material for: Comparison of Diploid and Triploid Atlantic Salmon (Salmo salar) Physiological Embryonic Development
Source: Animals (Basel). 2023 Oct 28;13(21):3352. doi: 10.3390/ani13213352 (PMC10647732; doi:10.3390/ani13213352)
Supplement: Supplementary file 1 [file animals-13-03352-s001.zip › animals-2648674-supplementary.pdf]

# Supplementary Materials: Comparison of diploid and triploid Atlantic salmon (*Salmo salar*) physiological embryonic development

Callum Howard 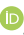, John F. Taylor 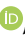, Herve Migaud 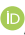, Alejandro P. Gutierrez 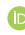 and Michaël Bekaert 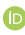

| Degree day | Stage*                                                                              | Diploid                                                                             | Triploid                                                                              |
|------------|-------------------------------------------------------------------------------------|-------------------------------------------------------------------------------------|---------------------------------------------------------------------------------------|
| 6          | 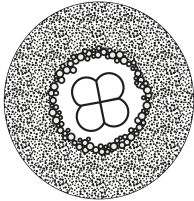   | 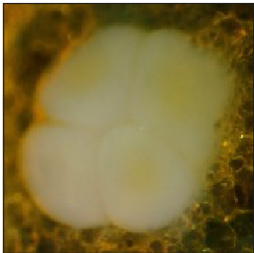   | 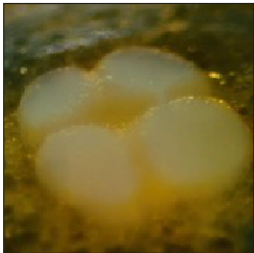   |
| 18         | 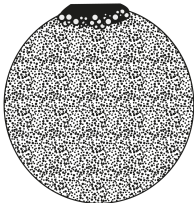  | 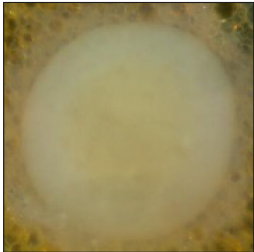  | 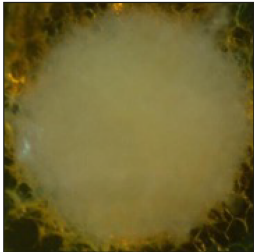  |
| 36         | 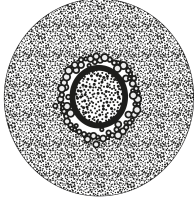 | 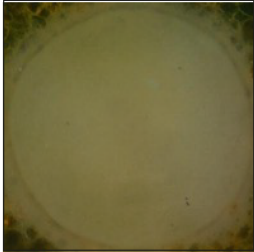 | 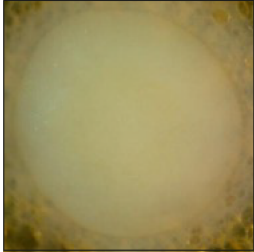 |
| 54         | 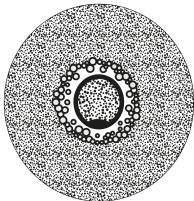 | 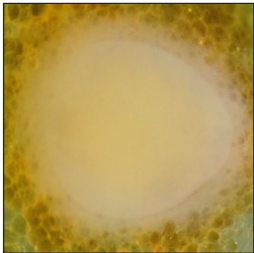 | 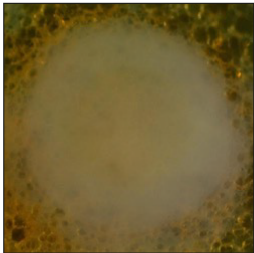 |
| 72         | 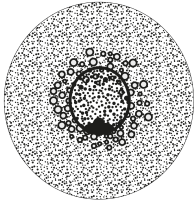 | 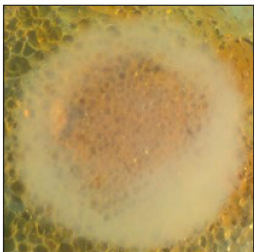 | 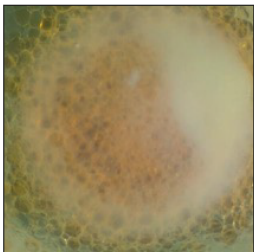 |

**Figure S1.** Comparison of Diploid and Triploid Atlantic Salmon (*Salmo salar*) embryos to the drawings of diploid embryos found in Gorodilov [1]. Degree-days state the time at which the photographs were taken.

| Degree day | Stage*                                                                                                                                                                | Diploid                                                                              | Triploid                                                                              |
|------------|-----------------------------------------------------------------------------------------------------------------------------------------------------------------------|--------------------------------------------------------------------------------------|---------------------------------------------------------------------------------------|
| 90         | 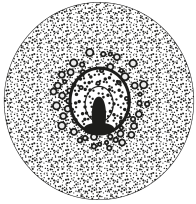                                                                                     | 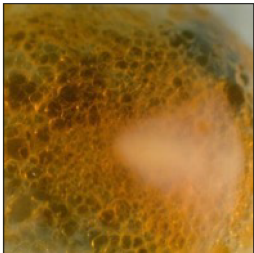    | 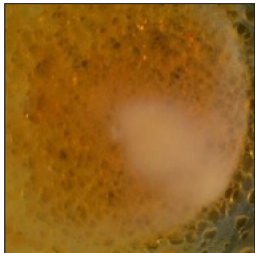   |
| 108        | 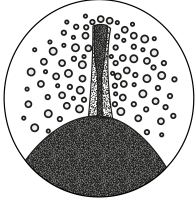                                                                                     | 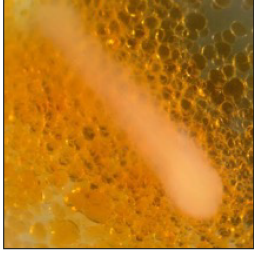    | 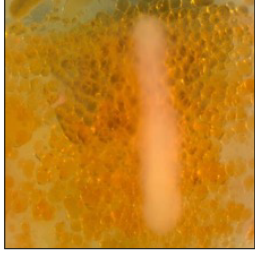   |
| 126        | 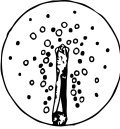 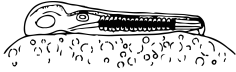 | 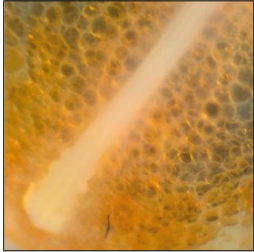   | 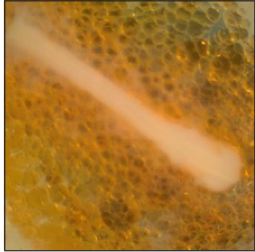  |
| 144        | 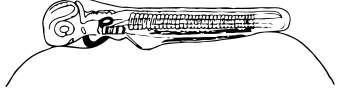                                                                                   | 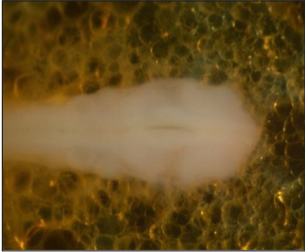 | 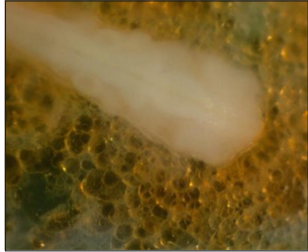 |
| 162        | 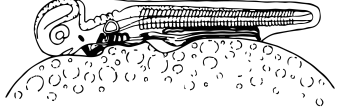                                                                                   | 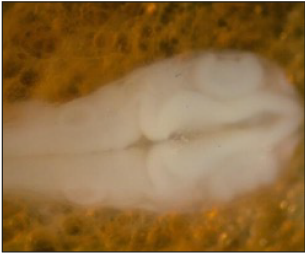 | 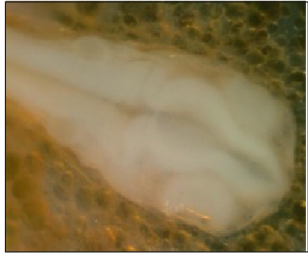 |
| 180        | 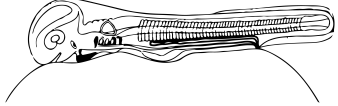                                                                                   | 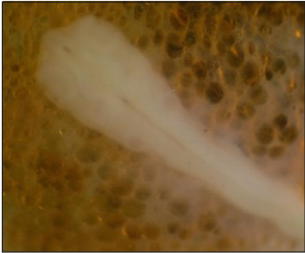 | 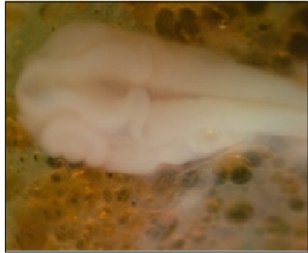 |

Figure S1. Degree day 90 to 180.

| Degree day | Stage*                                                                              | Diploid                                                                              | Triploid                                                                              |
|------------|-------------------------------------------------------------------------------------|--------------------------------------------------------------------------------------|---------------------------------------------------------------------------------------|
| 198        | 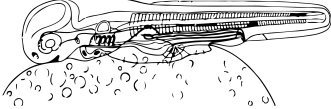   | 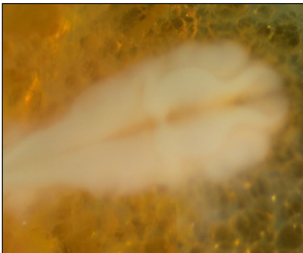   | 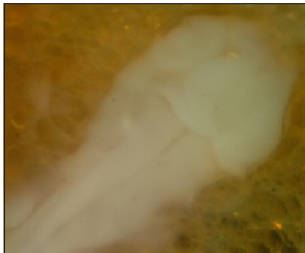   |
| 216        | 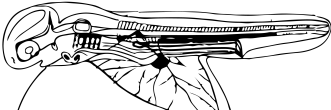   | 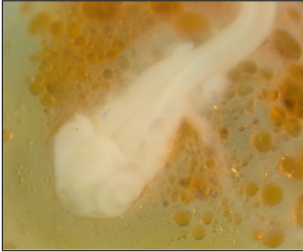   | 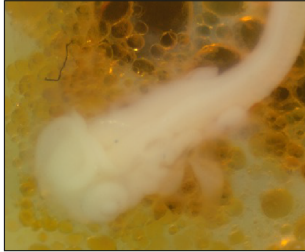   |
| 234        | 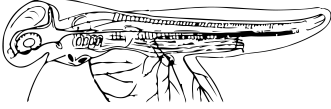  | 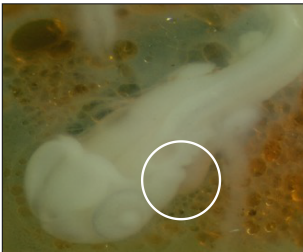  | 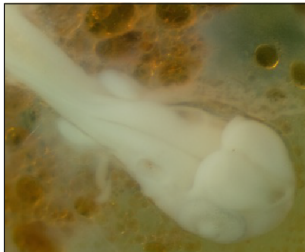  |
| 252        | 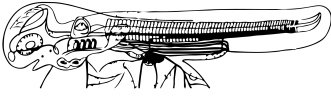 | 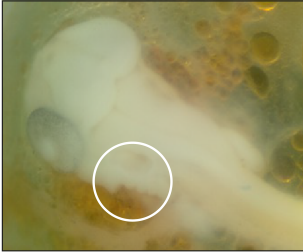 | 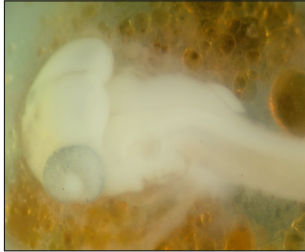 |
| 270        | 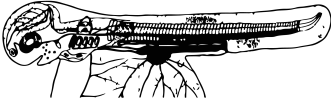 | 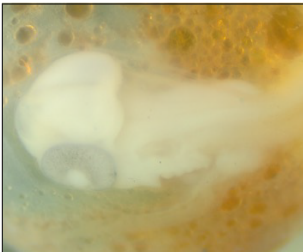 | 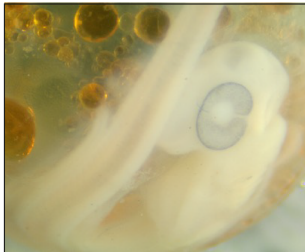 |
| 288        | 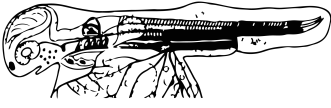 | 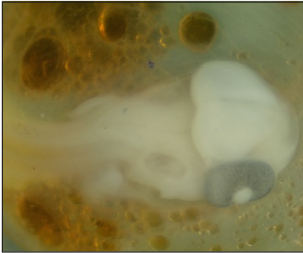 | 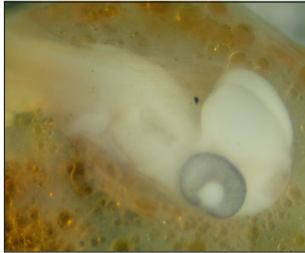 |

**Figure S1.** Degree day 198 to 288. For clarity gill arches are highlighted by a circle in pictures at 234 and 252 degree days, they can also be observed in a number of other photo.

| Degree day | Stage*                                                                              | Diploid                                                                              | Triploid                                                                              |
|------------|-------------------------------------------------------------------------------------|--------------------------------------------------------------------------------------|---------------------------------------------------------------------------------------|
| 306        | 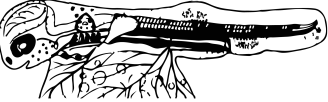   | 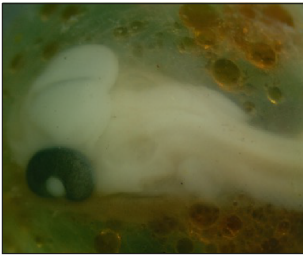   | 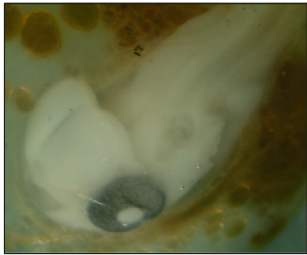   |
| 324        | 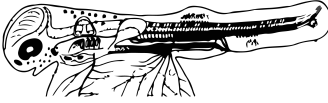   | 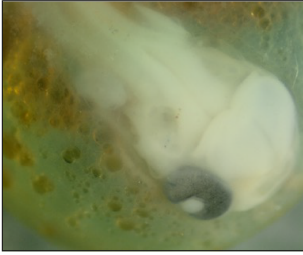   | 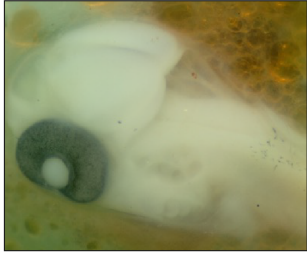   |
| 342        | 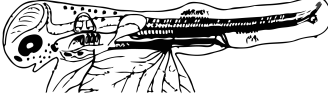  | 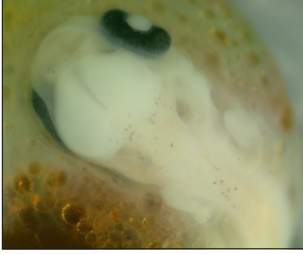  | 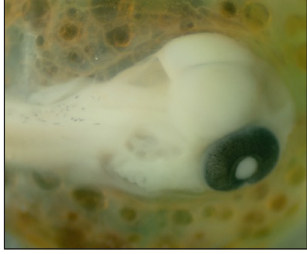  |
| 360        | 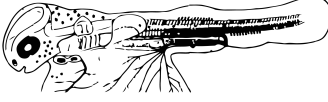 | 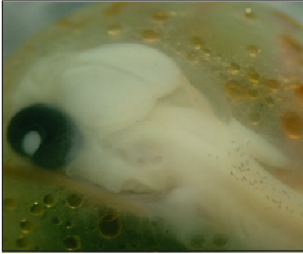 | 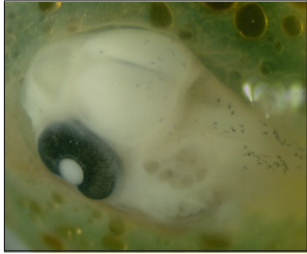 |
| 378        | 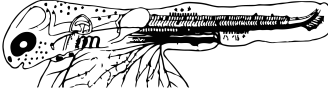 | 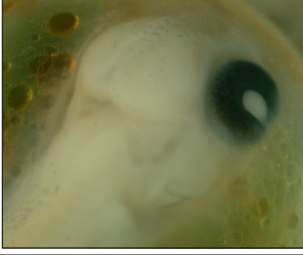 | 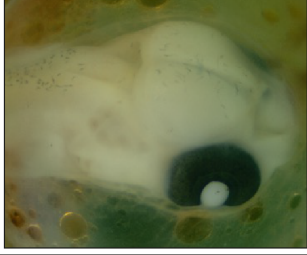 |
| 396        | 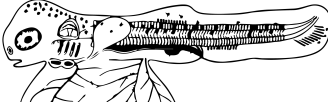 | 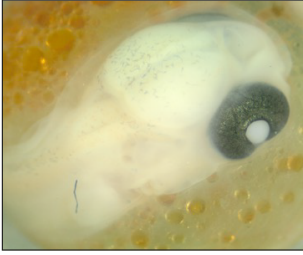 | 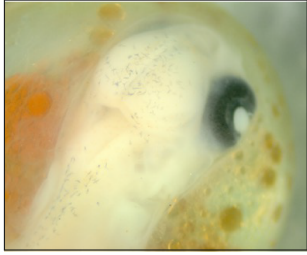 |

Figure S1. Degree-day 306 to 396.

| Degree day | Stage*                                                                            | Diploid                                                                            | Triploid                                                                            |
|------------|-----------------------------------------------------------------------------------|------------------------------------------------------------------------------------|-------------------------------------------------------------------------------------|
| 414        | 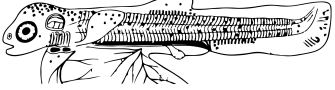 | 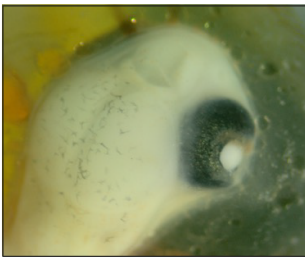 | 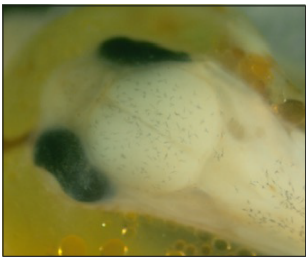 |
| 432        | 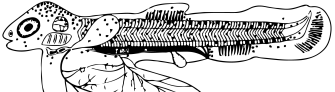 | 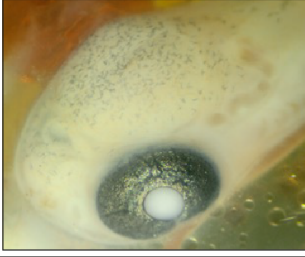 | 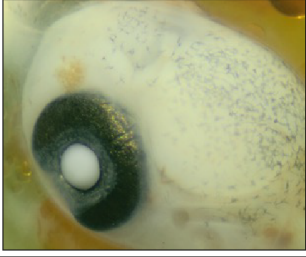 |

**Figure S1.** Degree-day 414 to 432.

## References

1. Gorodilov, Y.N. Description of the early ontogeny of the Atlantic salmon, *Salmo salar*, with a novel system of interval (state) identification. *Environ. Biol. Fishes* **1996**, *47*, 109–127. <https://doi.org/10.1007/bf00005034>.

**Disclaimer/Publisher's Note:** The statements, opinions and data contained in all publications are solely those of the individual author(s) and contributor(s) and not of MDPI and/or the editor(s). MDPI and/or the editor(s) disclaim responsibility for any injury to people or property resulting from any ideas, methods, instructions or products referred to in the content.
